# Supplementary material
Source: publisher figshare collection journal article supplement (https://acs.figshare.com/ndownloader/files/13683134)
Supplement: Supplementary file 1 [file 13683134]

*Supporting Information for*

**Ultrasensitive Fluorescence Detection of Peroxymonosulfate Based on a Sulfate  
Radical-Mediated Aromatic Hydroxylation**

Gui-Xiang Huang<sup>†</sup>, Jin-Yan Si<sup>†</sup>, Chen Qian, Wei-Kang Wang, Shu-Chuan Mei,  
Chu-Ya Wang, Han-Qing Yu\*

CAS Key Laboratory of Urban Pollutant Conversion, Department of Applied  
Chemistry, University of Science & Technology of China, Hefei, 230026, China

<sup>†</sup> These authors contributed equally to this work.

**\*Corresponding author:**

Prof. Han-Qing Yu, E-mail: [hqyu@ustc.edu.cn](mailto:hqyu@ustc.edu.cn)

This supplementary material contains 15-page document, including 3 tables, 10  
figures, references and this cover page.

**Table S1.** Comparison of Linear Range and Detection Limit between the BA Fluorometry and Other PMS Determination Methods.

| method                  | linear range<br>( $\mu\text{M}$ ) | detection limit<br>( $\mu\text{M}$ ) | reference        |
|-------------------------|-----------------------------------|--------------------------------------|------------------|
| thermometric titrimetry | unreported                        | 50                                   | 1                |
| HPLC                    | unreported                        | 0.5                                  | 2                |
| chemiluminescence       | 0.4–2                             | 0.05                                 | 3                |
| KI spectrophotometry    | 12–115                            | 3.62                                 | 4                |
| DPD spectrophotometry   | 10–100                            | 10                                   | 5                |
| MO spectrophotometry    | 0.2–100                           | 0.09                                 | 6                |
| AO7 spectrophotometry   | 0–80                              | 0.08                                 | 7                |
| MB spectrophotometry    | 0–100                             | 0.10                                 | 7                |
| MV spectrophotometry    | 0–80                              | 0.08                                 | 7                |
| RhB spectrophotometry   | 0–40                              | 0.04                                 | 7                |
| <b>BA fluorometry</b>   | <b>0–100</b>                      | <b>0.01</b>                          | <b>this work</b> |

**Table S2.** Concentrations of the Tested Cations and Anions.

| cation <sup>a</sup> | concentration<br>(mg L <sup>-1</sup> ) | anion <sup>b</sup>            | concentration<br>(mg L <sup>-1</sup> ) |
|---------------------|----------------------------------------|-------------------------------|----------------------------------------|
| K <sup>+</sup>      | 30                                     | Cl <sup>-</sup>               | 125                                    |
| Ca <sup>2+</sup>    | 80                                     | HCO <sub>3</sub> <sup>-</sup> | 200                                    |
| Mg <sup>2+</sup>    | 35                                     | NO <sub>3</sub> <sup>-</sup>  | 6                                      |
| Al <sup>3+</sup>    | 0.1                                    | SO <sub>4</sub> <sup>2-</sup> | 100                                    |
| Fe <sup>3+</sup>    | 0.1                                    | PO <sub>4</sub> <sup>3-</sup> | 2.5                                    |
| Mn <sup>2+</sup>    | 0.05                                   |                               |                                        |

<sup>a</sup>The counter ion is SO<sub>4</sub><sup>2-</sup>; <sup>b</sup>the counter ion is Na<sup>+</sup>.

**Table S3.** Conversion Factor of BA and SA Based on the Activation of PMS in the BA/PMS/Co<sup>2+</sup> System.

| $\Delta[\text{HSO}_5^-]$<br>( $\mu\text{M}$ ) | $\Delta[\text{BA}]$<br>( $\mu\text{M}$ ) | $\Delta[\text{BA}]/\Delta[\text{HSO}_5^-]$ | $\Delta[\text{SA}]$<br>( $\mu\text{M}$ ) | $\Delta[\text{SA}]/\Delta[\text{HSO}_5^-]$ |
|-----------------------------------------------|------------------------------------------|--------------------------------------------|------------------------------------------|--------------------------------------------|
| 70                                            | 31.3                                     | 0.45                                       | 8.8                                      | 0.13                                       |
| 350                                           | 221.4                                    | 0.63                                       | 39.2                                     | 0.11                                       |
| 700                                           | 346.5                                    | 0.49                                       | 64.6                                     | 0.09                                       |
| average                                       | —                                        | 0.52                                       | —                                        | 0.11                                       |

$\Delta[\text{SA}]$ : the production of SA per unit volume

$\Delta[\text{HSO}_5^-]$  and  $\Delta[\text{BA}]$ : the consumption of  $\text{HSO}_5^-$  and BA per unit volume

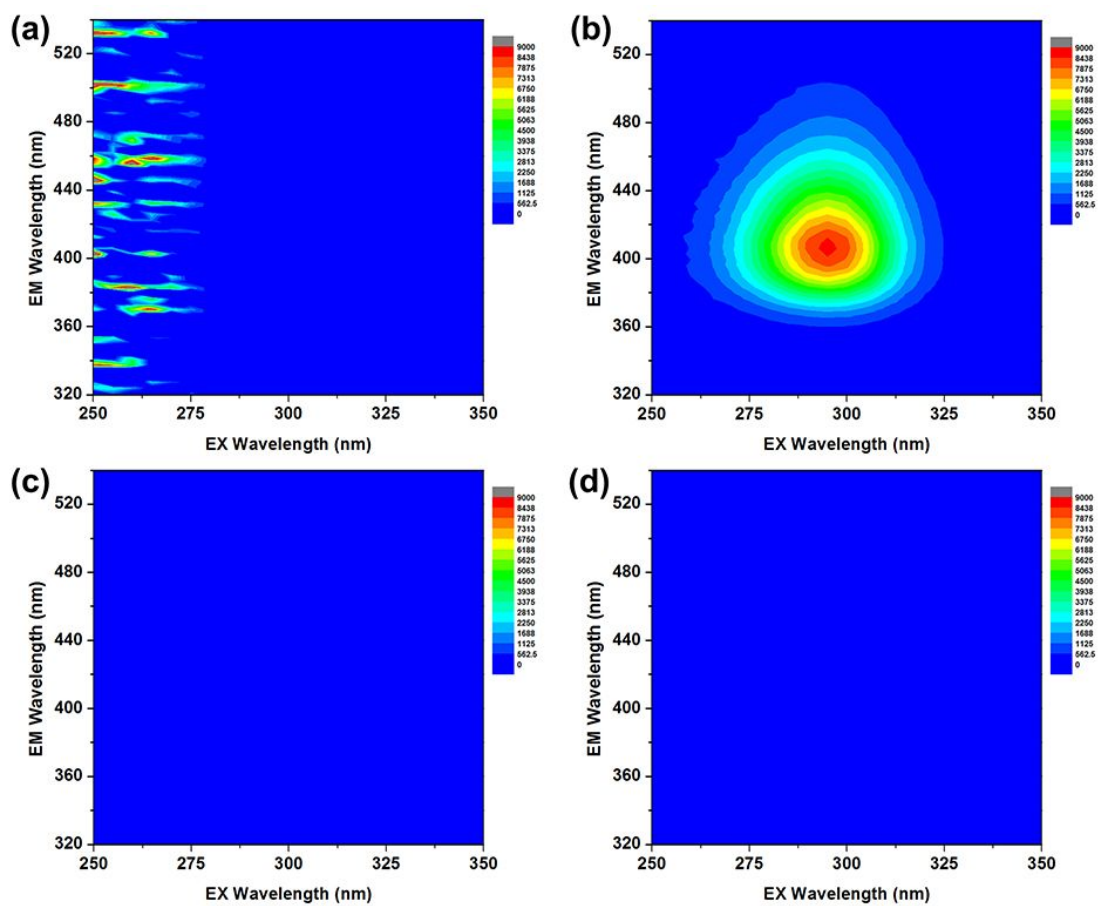

**Figure S1.** EEMS of BA (a), *ortho*- (b), *meta*- (c), and *para*- (d) hydroxybenzoic acids.

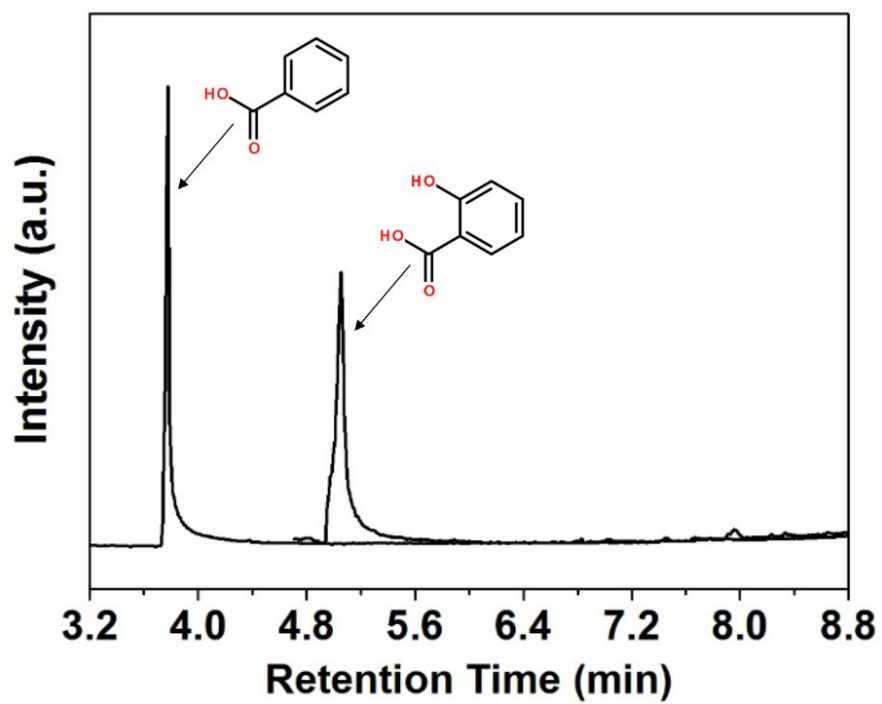

**Figure S2.** GC-MS chromatogram of the BA/PMS/Co<sup>2+</sup> reaction sample.

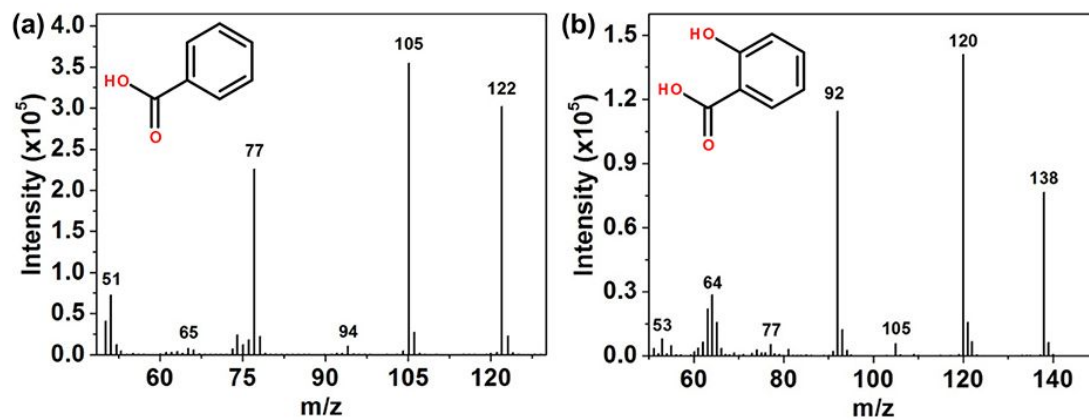

**Figure S3.** GC-MS spectra of BA (a) and SA (b).

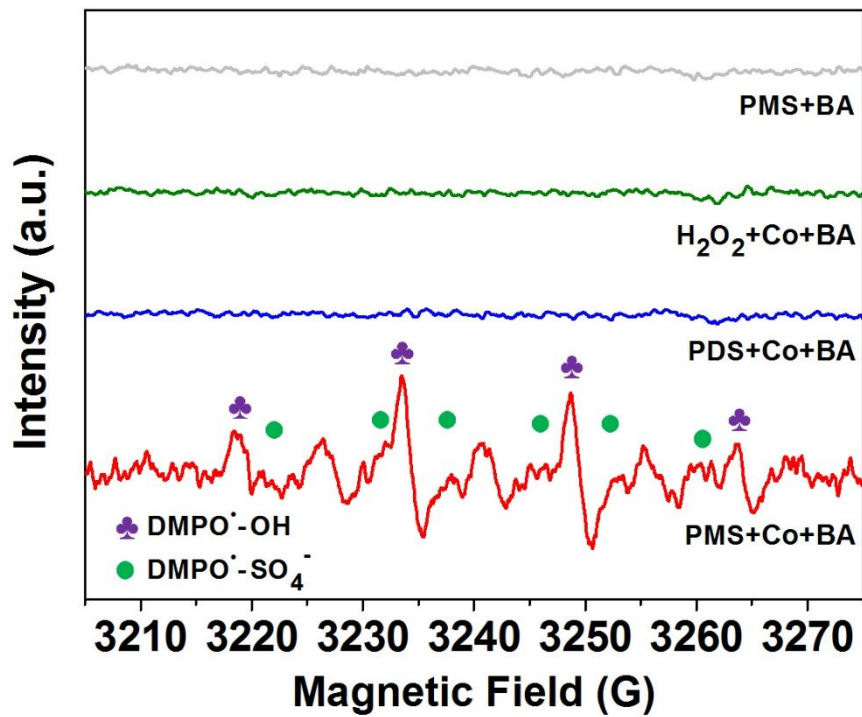

**Figure S4.** EPR spectra in the activation of PMS under different conditions.



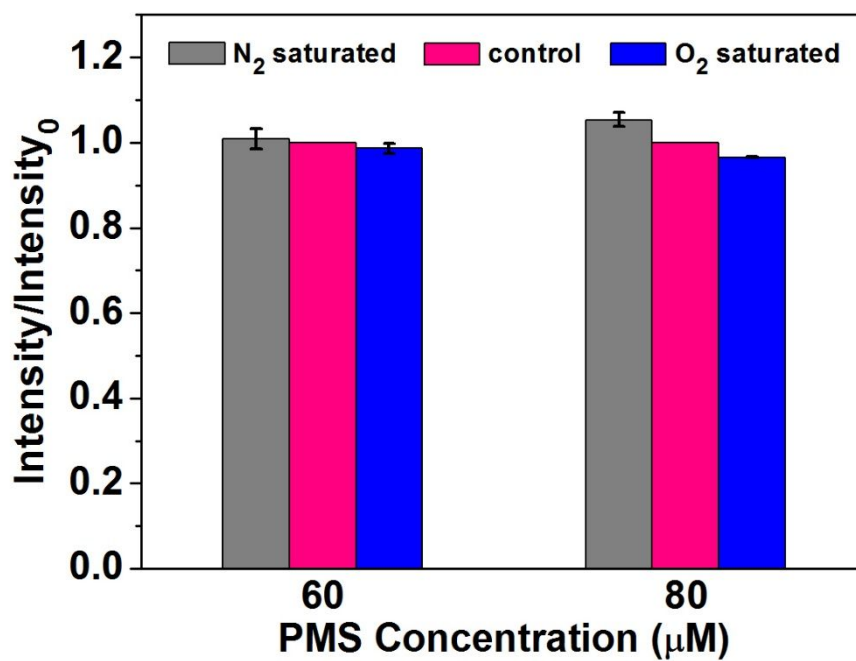

**Figure S5.** Impact of atmosphere conditions on the fluorescence intensity of the BA/PMS/Co<sup>2+</sup> system. Reaction conditions: [BA] = 10 mM, [Co<sup>2+</sup>] = 50 μM, and solution pH = 6.5.

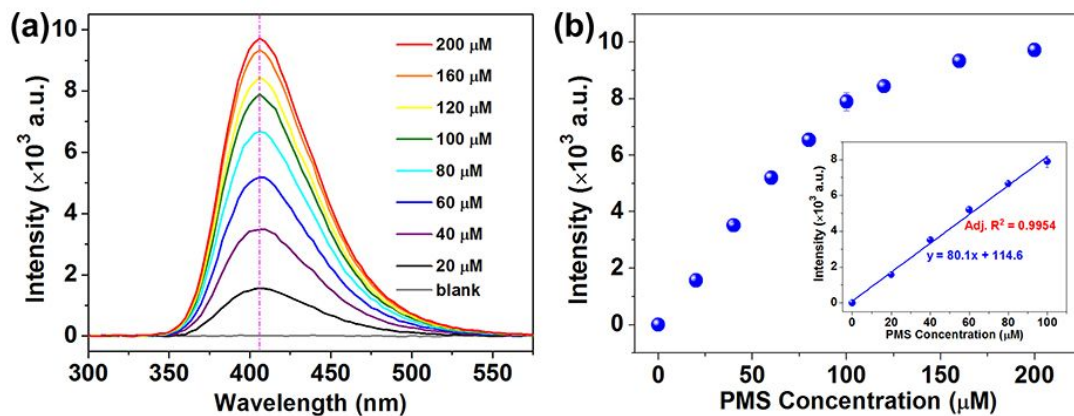

**Figure S6.** Fluorescence emission spectra at different PMS concentrations (a), relationship between fluorescence intensity and PMS concentration (b) and the corresponding calibration curve (inset in b). Reaction conditions: [BA] = 10 mM, [Co<sup>2+</sup>] = 50 μM, and solution pH = 6.5.

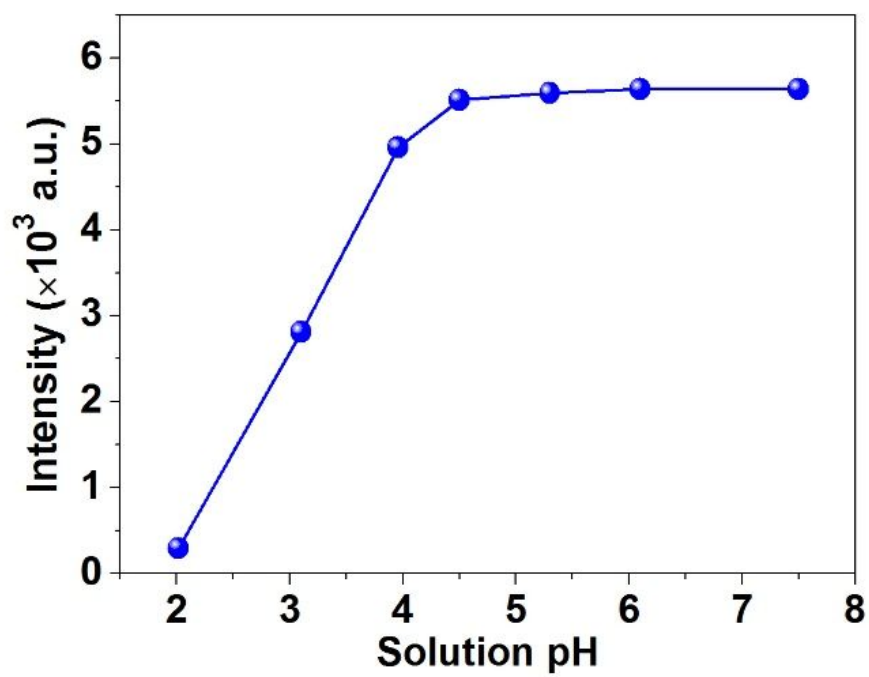

**Figure S7.** Effect of solution pH on the fluorescence intensity of SA solution.

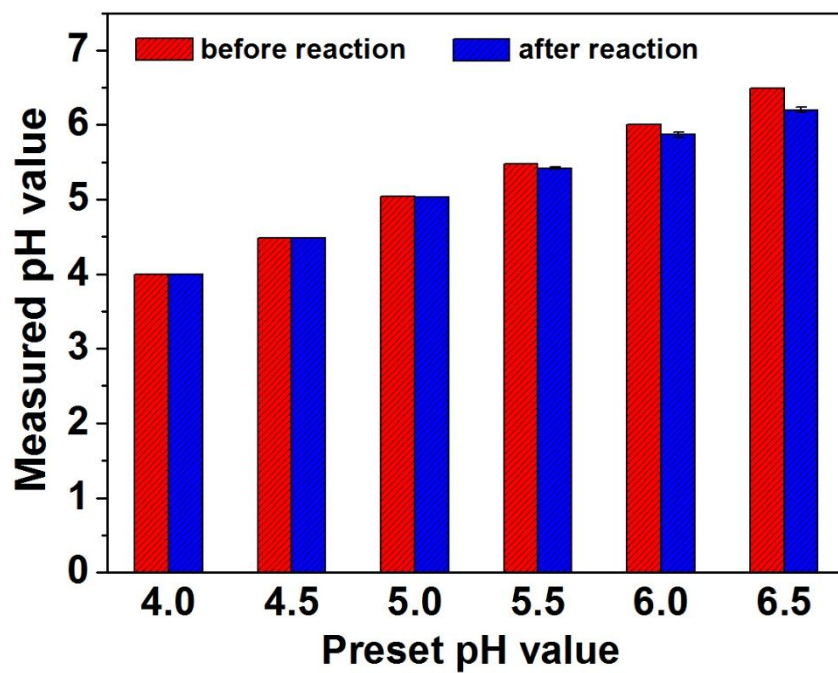

**Figure S8.** Solution pH changing profiles after 3-min reaction of BA/PMS/Co<sup>2+</sup> system. Reaction conditions: [PMS] = 80  $\mu$ M, [BA] = 10 mM, [Co<sup>2+</sup>] = 50  $\mu$ M.

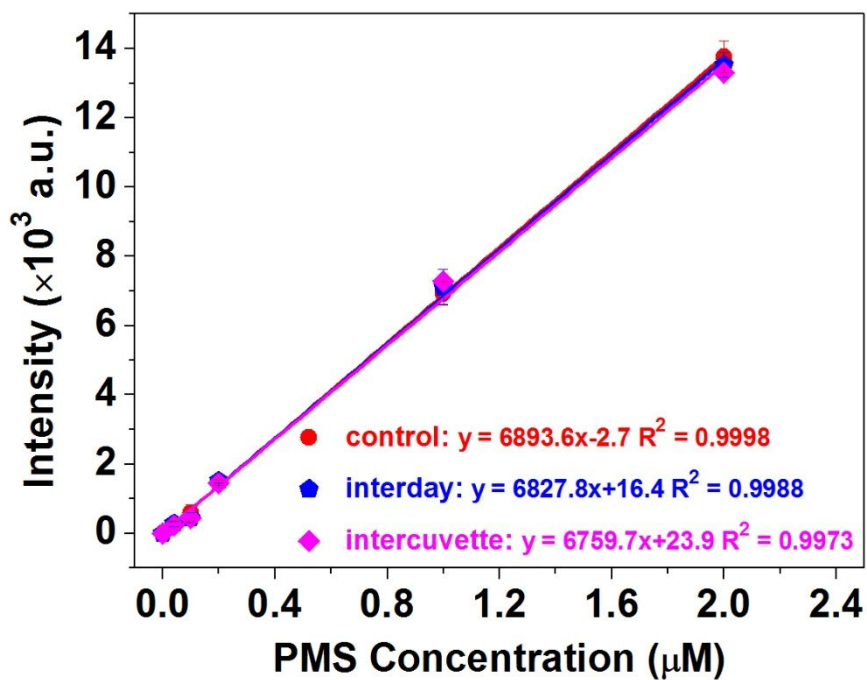

**Figure S9.** Calibration curves of PMS obtained on different dates and with different cuvettes. Reaction conditions: [BA] = 20 mM, [Co<sup>2+</sup>] = 50 μM and solution pH = 5.5.

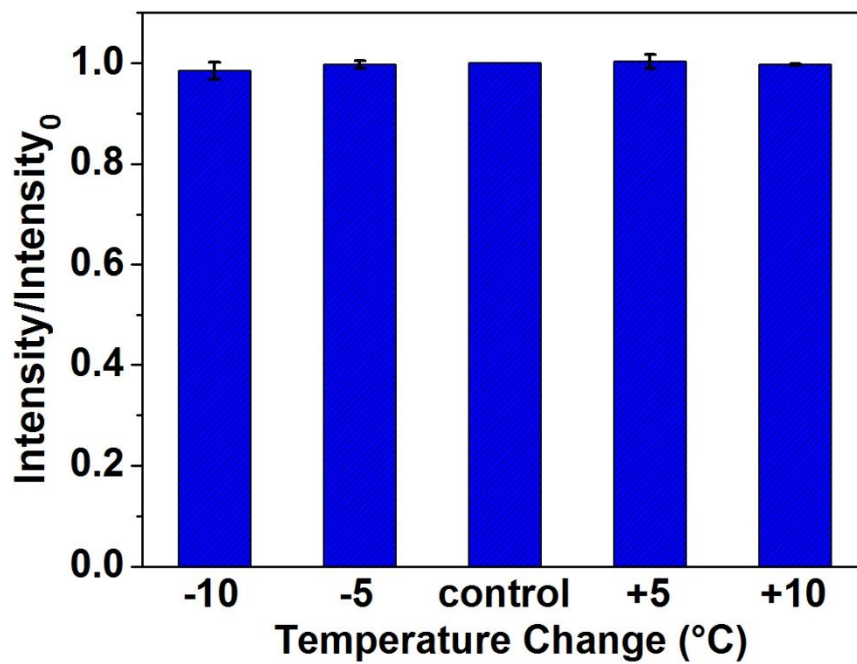

**Figure S10.** Impact of reaction temperature on PMS determination in BA fluorometry. Reaction conditions: [PMS] = 80  $\mu$ M, [BA] = 20 mM, [Co<sup>2+</sup>] = 50  $\mu$ M, solution pH = 5.5, and temperature of the control group was 25 °C.

## REFERENCES

- (1) Boudeville, P. E. A. Simultaneous determination of hydrogen peroxide, peroxymonosulfuric acid, and peroxydisulfuric acid by thermometric titrimetry. *Anal. Chem.* **1983**, *55*, 612-615.
- (2) Zhang, T.; Zhu, H. B.; Croué, J. P. Production of sulfate radical from peroxymonosulfate induced by a magnetically separable  $\text{CuFe}_2\text{O}_4$  spinel in water: Efficiency, stability, and mechanism. *Environ. Sci. Technol.* **2013**, *47*, 2784-2791.
- (3) Zinchuk, V. K.; Stadnichuk, E. N. Chemiluminescence Determination of Monopersulfuric Acid. *J. Anal. Chem+*. **2001**, *56*, 918-919.
- (4) Waclawek, S.; Grübel, K.; Černík, M. Simple spectrophotometric determination of monopersulfate. *Spectrochim. Acta A* **2015**, *149*, 928-933.
- (5) Gokulakrishnan, S.; Mohammed, A.; Prakash, H. Determination of persulphates using N,N-diethyl-p-phenylenediamine as colorimetric reagent: Oxidative coloration and degradation of the reagent without bactericidal effect in water. *Chem. Eng. J.* **2016**, *286*, 223-231.
- (6) Zou, J.; Ma, J.; Zhang, X.; Xie, P. Rapid spectrophotometric determination of peroxymonosulfate in water with cobalt-mediated oxidation decolorization of methyl orange. *Chem. Eng. J.* **2014**, *253*, 34-39.
- (7) Zhang, J. Q.; Ma, J.; Zou, J.; Chi, H. Z.; Song, Y. Spectrophotometric determination of peroxymonosulfate anions via oxidative decolorization of dyes induced by cobalt. *Anal. Methods-UK* **2016**, *8*, 973-978.
